# Supplementary material for: Efficient Na+-storage in a Li4Ti5O12 anode to expand the voltage-window for full SIBs of high energy density
Source: Royal Society of Chemistry journal article supplement (doi:10.1039/d1ra06313h), 2021-01-01
Supplement: d1ra06313h1.pdf [file d1ra06313h1.pdf]

# Supporting Information

**Efficient Na<sup>+</sup>-storage in Li<sub>4</sub>Ti<sub>5</sub>O<sub>12</sub> anode to expand voltage-window for full SIBs of high energy density**

**Chao Li<sup>1\*</sup>, Binhui Luo<sup>1</sup>, Youman Zhao<sup>2</sup>, Yongsheng Chen<sup>1</sup>, Hua Yang<sup>3\*</sup>, Jingang Song<sup>1</sup>, Lili Zhao<sup>1</sup>, Xiaobo Fu<sup>1</sup>**

<sup>1</sup>College of Chemical Engineering and Energy Technology, Dongguan University of Technology, Dongguan 523808, China

<sup>2</sup>Chuangming battery technology Co., Ltd. of Dongguan City, Dongguan 523808, China

<sup>3</sup>Dongguan Neutron Science Center, No.1 Zhongziyuan Road, Dalang, Dongguan 523803, China

Figure S1:

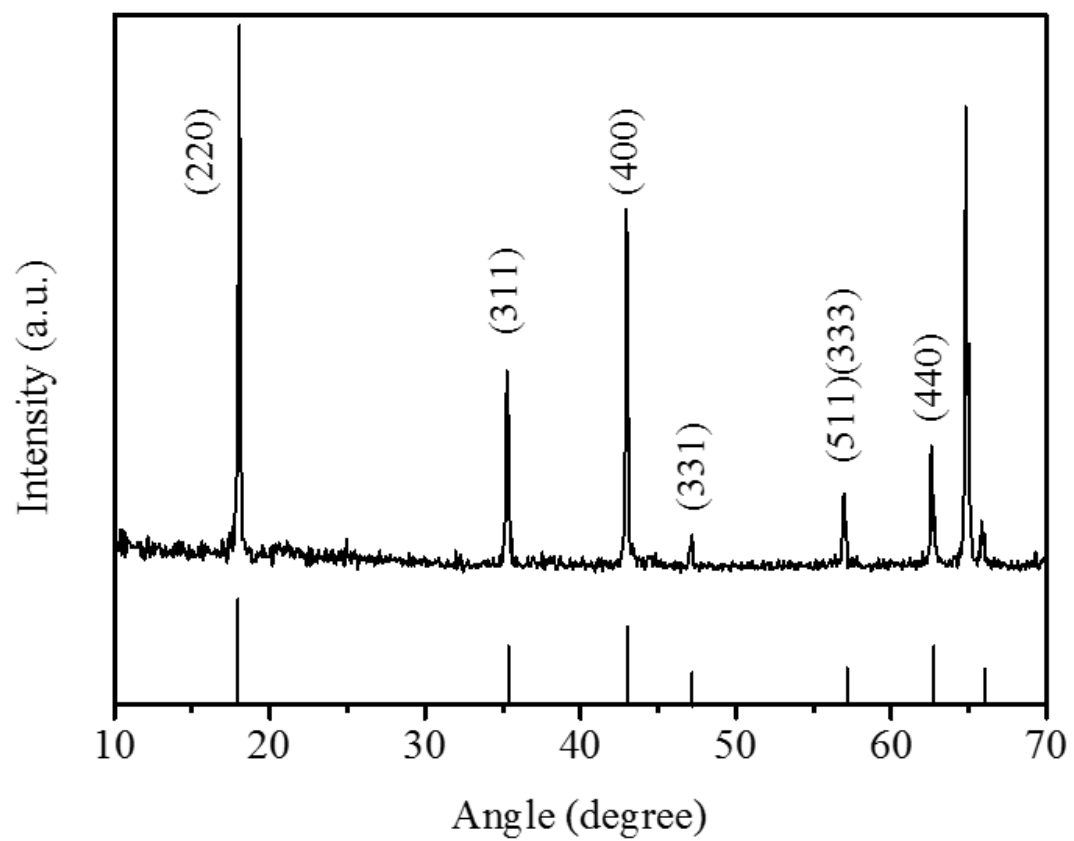

Figure S2:

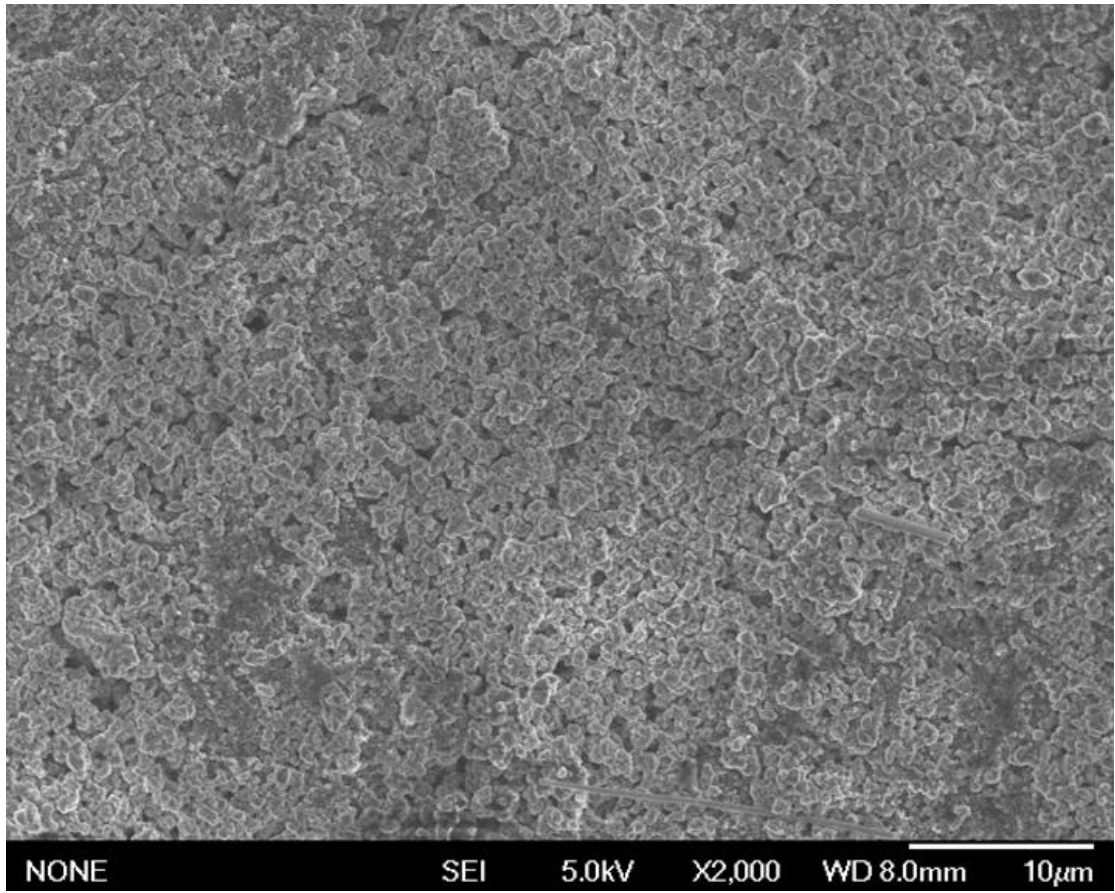

Figure S3:

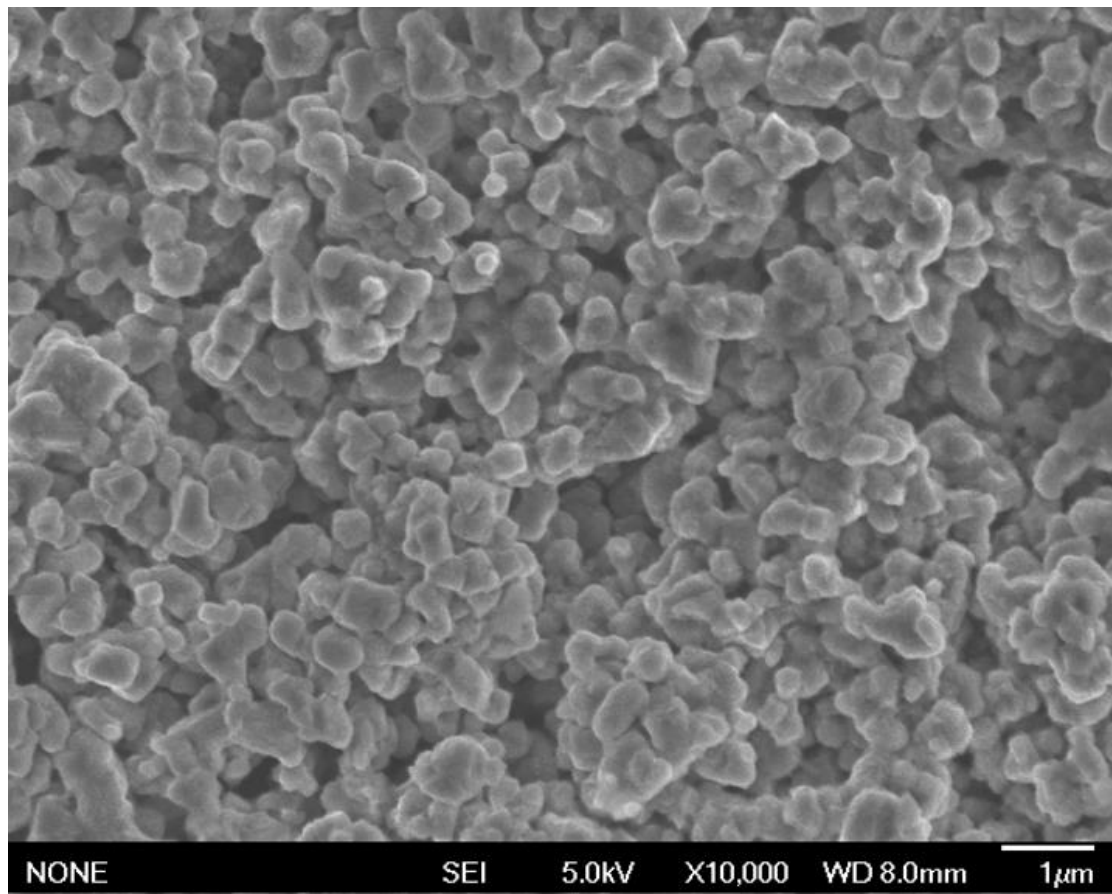

Figure S4:

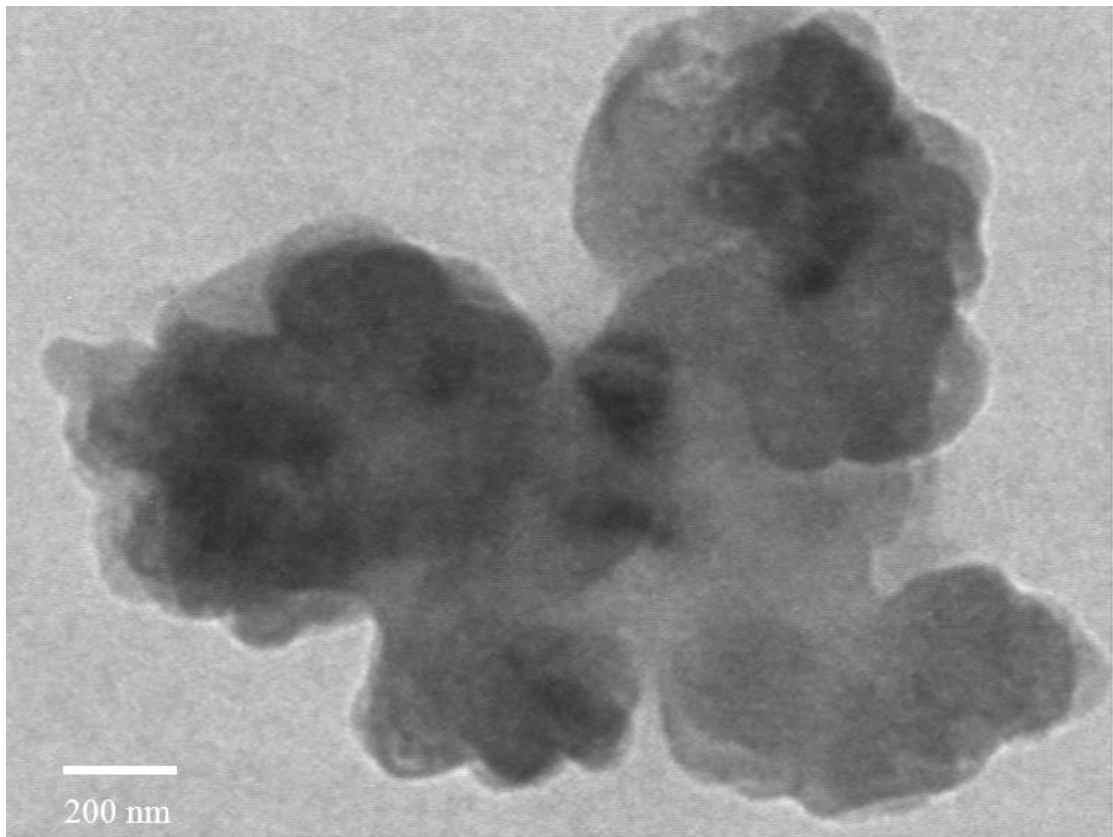

Table S1:

| NO | Li <sub>4</sub> Ti <sub>5</sub> O <sub>12</sub> | Counter<br>electrode | Capacity | cycling     | Reference |
|----|-------------------------------------------------|----------------------|----------|-------------|-----------|
| 1  | Li <sub>4</sub> Ti <sub>5</sub> O <sub>12</sub> | Sodium               | 159      | 50cls, 96%  | 1,2       |
| 2  | Li <sub>4</sub> Ti <sub>5</sub> O <sub>12</sub> | Sodium               | 158      | 25cls, 30%  | 3         |
| 3  | Nanorods-LTO                                    | Sodium               | *        | *           | 4         |
| 4  | Nanosheets-<br>LTO                              | Sodium               | *        | *           | 5         |
| 5  | Coating-LTO                                     | Sodium               | 170      | 200cls, 99% | 6         |
| 6  | Porous-LTO                                      | Sodium               | 170      | 500cls, 75% | 7         |
| 7  | LTO-TiO <sub>2</sub>                            | Sodium               | 130      | *           | 8         |
| 8  | LTO-CNTs                                        | Sodium               | 133      | 100cls,163  | 9,10,11   |
| 9  | Nano-LTO                                        | Sodium               | 168      | 50cls,96.3% | 12        |
| 10 | rGO-LTO                                         | Sodium               | 195      | 12000       | 13        |
| 11 | LTO-Gx                                          |                      |          | 400cls,93%  | 14        |
| 12 | LTO-<br>carbonaceous                            |                      | 162      | 600cls,68%  | 15        |

Reference:

- [1] Y. Sun, L. Zhao, H. Pan, X. Lu, L. Gu, Y.-S. Hu, H. Li, M. Armand, Y. Ikuhara, L. Chen, X. Huang, *Nat. Commun.* **2013**, *4*, 1870.
- [2] S. Guo, J. Yi, Y. Sun, H. Zhou, *Energy Environ. Sci.* 2016, *9*, 2978.
- [3] M. Zúcalov *á*, B. Pitn *ˇ*a L *á*skov *á*, M. Klementov *á*, L. Kavan, *Electrochim. Acta* 2017, *245*, 505.
- [4] Q. Zhou, L. Liu, J. Tan, Z. Yan, Z. Huang, X. Wang, *J. Power Sources* 2015, *283*, 243.
- [5] X. Feng, H. Zou, H. Xiang, X. Guo, T. Zhou, Y. Wu, W. Xu, P. Yan, C. Wang, J.-G. Zhang, Y. Yu, *ACS Appl. Mater. Interfaces* 2016, *8*, 16718.
- [6] Y. Liu, J. Liu, M. Hou, L. Fan, Y. Wang, Y. Xia, *J. Mater. Chem. A* 2017, *5*, 10902.
- [7] G. Hasegawa, K. Kanamori, T. Kiyomura, H. Kurata, K. Nakanishi, T. Abe, *Adv. Energy Mater.* 2015, *5*, 1400730.
- [8] L. Gao, L. Wang, S. Dai, M. Cao, Z. Zhong, Y. Shen, M. Wang, *J. Power Sources* 2017, *344*, 223.
- [9] V. Aravindan, J. Sundaramurthy, P. Suresh Kumar, Y.-S. Lee, S. Ramakrishna, S. Madhavi, *Chem. Commun.* 2015, *51*, 2225.
- [10] V. Aravindan, P. Sennu, Y.-S. Lee, S. Madhavi, *J. Phys. Chem. Lett.* 2017, *8*, 4031.
- [11] J. Liu, K. Tang, K. Song, P. A. van Aken, Y. Yu, J. Maier, *Phys. Chem.*



Chem. Phys. 2013, 15, 20813.

[12] K.-T. Kim, C.-Y. Yu, C. S. Yoon, S.-J. Kim, Y.-K. Sun, S.-T. Myung, Nano Energy 2015, 12, 725.

[13] C. Chen, H. Xu, T. Zhou, Z. Guo, L. Chen, M. Yan, L. Mai, P. Hu, S. Cheng, Y. Huang, J. Xie, Adv. Energy Mater. 2016, 6, 1600322.

[14] Y. Sha, L. Li, S. Wei, Z. Shao, J. Alloys Compd. 2017, 705, 164.

[15] Y. Tian, Z. L. Wu, G. B. Xu, L. W. Yang, J. X. Zhong, RSC Adv. 2017, 7, 3293.
